# Supplementary material for: Arrays of spherical nanostructured oxide particles for photon management enhancement in photovoltaic devices
Source: Royal Society of Chemistry journal article supplement (doi:10.1039/d2tc02619h), 2022-01-01
Supplement: d2tc02619h1.pdf [file d2tc02619h1.pdf]

## **Supporting Information**

### **Arrays of Spherical Nanostructured Oxide Particles for Photon Management Enhancement in Photovoltaic Devices**

*Lin Zheng<sup>1</sup>, Zhizai Li<sup>1</sup>, Xufeng Zhou<sup>2</sup>, Hong Zhang<sup>3</sup>, Qian Wang<sup>1</sup>, Hao Jia<sup>1,\*</sup>, and Zhiwen Jin<sup>1,\*</sup>*

Dr. L. Zheng, Dr. Z. Li, Prof. Q. Wang, Prof. H. Jia, Prof. Z. Jin

<sup>1</sup>School of Physical Science and Technology & Key Laboratory for Magnetism and Magnetic Materials of the Ministry of Education, Lanzhou University, Lanzhou 730000, China

Dr. X. Zhou

<sup>2</sup>School of Material Science and Engineering, Liaocheng University, Liaocheng 252000, China

Dr. H. Zhang

<sup>3</sup>Electron Microscopy Centre of Lanzhou University, School of Materials and Energy, Lanzhou University, Lanzhou, China

E-mail: jinzw@lzu.edu.cn, jiahao@lzu.edu.cn

**Keywords:** Spherical nanostructured oxide particles (SNOPs); Photon management; Light field interference; Photovoltaic devices

## Experimental Section

### Materials preparation

*Materials:* N, N-Dimethylformamide (DMF, 99%), HI (57% wt%), and  $\text{TiCl}_4$  were gained from Alfa Aesar. Cesium iodide ( $\text{CsI}$ ,  $\geq 99.99\%$ ), 2,2',7,7'-tetrakis (N,N-di-p-methoxyphenylamine)-9,9'-spirobifluorene (Spiro-OMeTAD), lead (II) iodide ( $\text{PbI}_2$ ,  $>99.99\%$ ), lithium bis(tri-fluoromethanesulfonyl)imide (Li-TFSI), tert-butylpyridine (TBP) and tris(2-(1H-pyrazol-1-yl)-4-tert-butylpyridine) cobalt(III) tri[bis(trifluoromethane)sulfonimide] (FK209) were acquired from Xi'an Polymer Light Company. Aluminum oxide ( $\text{Al}_2\text{O}_3$ ,  $\alpha$ -phase, 200 nm, 99.99%), Zirconium dioxide ( $\text{ZrO}_2$ , 200 nm, 99.99%), and Silicon dioxide ( $\text{SiO}_2$ , 200 nm, 99.99%) were purchased from Alfa Aesar. We did not further purification of the materials before we used them.

*DMAI intermediate Synthesis:* Under the condition of an ice bath ( $0^\circ\text{C}$ ), DMF (25 mL) was gradually added dropwise to the HI (100 mL) solution, and stirred at 400 rpm for 6 hours (h). After the stirring is completed, use the rotary steaming apparatus to collect the precipitate at a temperature of about  $90^\circ\text{C}$ . Following that, it was dissolved in ethanol repeatedly and precipitated with anhydrous ether to obtain a white sample. Then heated in a vacuum oven at  $60^\circ\text{C}$  overnight to form DMAI powder.

*$\text{CsPbI}_3$  film preparation:* The precursor solution was formed by dissolving DMAI (0.1661 g),  $\text{PbI}_2$  (0.2766 g) and  $\text{CsI}$  (0.156 g) in 1 mL DMF solution under continuous stirring for 2 h.

*HTL Solution Preparation:* A solution was prepared by dissolving Spiro-OMeTAD (145 mg), 22  $\mu\text{L}$  Li-TFSI solution (520 mg Li-TFSI in 1 mL acetonitrile), 36  $\mu\text{L}$  TBP, and 36  $\mu\text{L}$  FK209 solution (300 mg FK209 in 1 mL acetonitrile) in 1 mL of CB solution.

### Device fabrication preparation

*Preparation of  $\text{TiO}_2$ -blocking layer:* The purchased FTO glass was ultrasonically cleaned with ethanol and isopropanol for 30 minutes (min), then dried with dry air, and treated with  $\text{O}_2$  plasma for 10 min. Afterward, the FTO glasses were immersed in 4.5 mL  $\text{TiCl}_4$  aqueous solution at  $70^\circ\text{C}$  for 60 min and washed with distilled water and ethanol. The compact  $\text{TiO}_2$  film was formed after annealing at  $200^\circ\text{C}$  for 30 min. To prepare SNOPs ( $\text{Al}_2\text{O}_3$ ,  $\text{ZrO}_2$ ,  $\text{SiO}_2$ ) doped  $\text{TiO}_2$  layer, first, dissolve the SNOPs in cyclohexane, followed spin-coat on clean FTO glass, and then continue the above steps.

*Growth of the  $\text{CsPbI}_3$  film:* The perovskite precursor solution was coated on  $\text{TiO}_2$  substrate by one-step spin-coating method at 1000 rpm for 10 s and 3000 rpm for 35 s, respectively. The final films were formed after annealing at  $210^\circ\text{C}$  for  $\sim 10$  minutes. To prepare SNOPs ( $\text{Al}_2\text{O}_3$ ,  $\text{ZrO}_2$ ,  $\text{SiO}_2$ ) doped PVK layer, we dissolve 0.1mg/mL of SNOPs in the prepared precursor solution and then continue the above steps.

*Assembly of the solar cells:* The hole transport layer (Spiro-OMeTAD) was coated on perovskite film by spin coating at 5000 rpm for 35 s. To prepare Spiro mixed with SNOPs ( $\text{Al}_2\text{O}_3$ ,  $\text{ZrO}_2$ ,  $\text{SiO}_2$ ), we dissolve 0.1 mg of SNOPs directly into Spiro. Finally, thermally evaporated thick gold ( $\sim 80$  nm) was used as top electrodes (devices area:  $0.09$   $\text{cm}^2$ ).

### **Characterization Section:**

*Absorbance and PL spectra:* Absorbance results were collected by FLS920T using the slowest scanning rate with one-second integration and a 2 nm slit width. The PL spectra were measured using a PicoQuant FluoTime 300.

*XRD:* The X-ray diffraction (XRD) patterns were characterized by the Shimadzu XRD-6000 X-ray diffractometer with a  $\text{Cu K}\alpha$  ( $\lambda = 0.1541$  nm).

*SEM:* The surface morphology of No addition and add SNOPs ( $\text{Al}_2\text{O}_3$ ,  $\text{ZrO}_2$ ,  $\text{SiO}_2$ ) was measured by SEM using the Hitachi S-4800 scanning electron microscope.

*J-V, EQE, and Steady measurement:* The *J-V* and Steady measurements were performed via the solar simulator (SS-F5-3A, Enlitech) along with AM 1.5G spectra whose intensity was calibrated by the certified standard silicon solar cell (SRC-2020, Enlitech) at  $100$   $\text{mW}/\text{cm}^2$ . This used reverse scan mode (from  $V_{OC}$  to  $J_{SC}$ ) and forward scan mode (from  $V_{OC}$  to  $J_{SC}$ ) with a scan rate of  $30$   $\text{mV}/\text{s}$ . The external quantum efficiency (EQE) data were obtained by using the solar-cell spectral-response measurement system (QE-R3011, Enlitech).

### **Simulation Section:**

The simulation mainly targets the light field. All the simulations are calculated with the finite-difference time-domain (FDTD) method. Periodic boundary conditions are used to simulate the infinite structural distributions. For each simulation, planar waves with different polarizations are incident to the device.

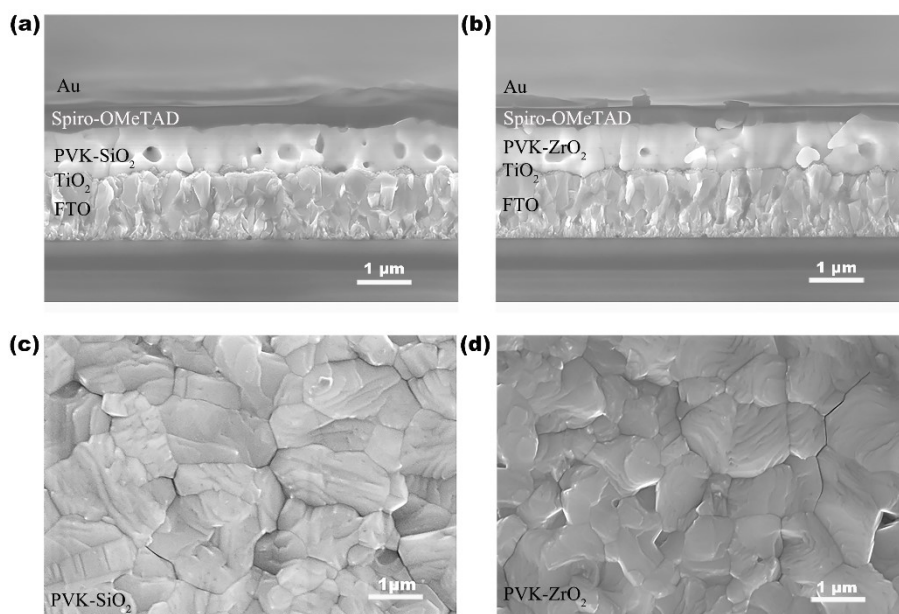

**Figure S1. SEM images of the cross-sectional and top views of the SNOPs added into the PVK layer of PSCs:** (a-b) The cross-sectional view of PVK-SiO<sub>2</sub> and PVK-ZrO<sub>2</sub>; (c-d) The top view of PVK-SiO<sub>2</sub> and PVK-ZrO<sub>2</sub>.

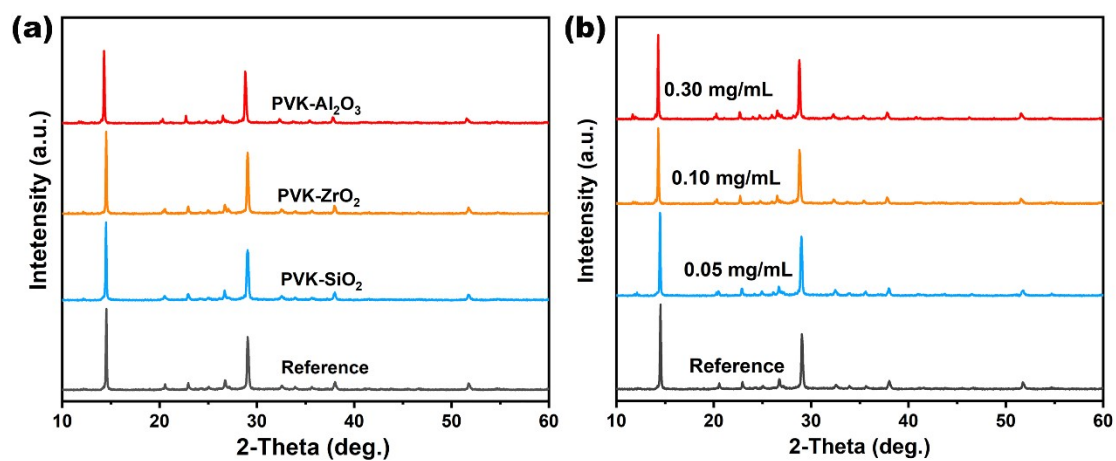

**Figure S2. XRD patterns of reference and three SNOPs added into PVK layer:** (a) For different SNOPs (SiO<sub>2</sub>, ZrO<sub>2</sub>, Al<sub>2</sub>O<sub>3</sub>) and (b) For different concentrations of Al<sub>2</sub>O<sub>3</sub>.

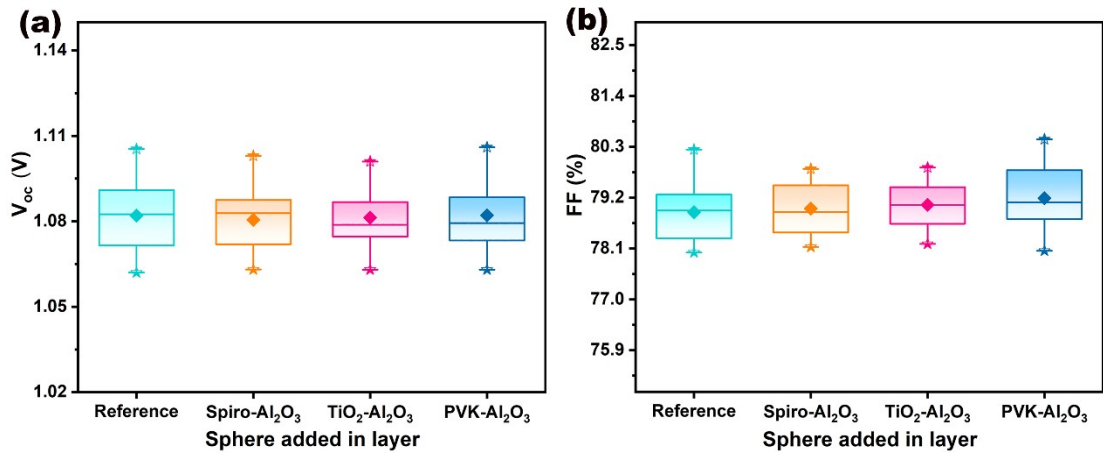

**Figure S3. Photovoltaic characterization:** Statistical distribution of four key parameters for PSCs (20 devices) in four cases (reference, TiO<sub>2</sub>-Al<sub>2</sub>O<sub>3</sub>, Spiro-Al<sub>2</sub>O<sub>3</sub>, PVK-Al<sub>2</sub>O<sub>3</sub>): (a)  $V_{oc}$  and (b) FF.

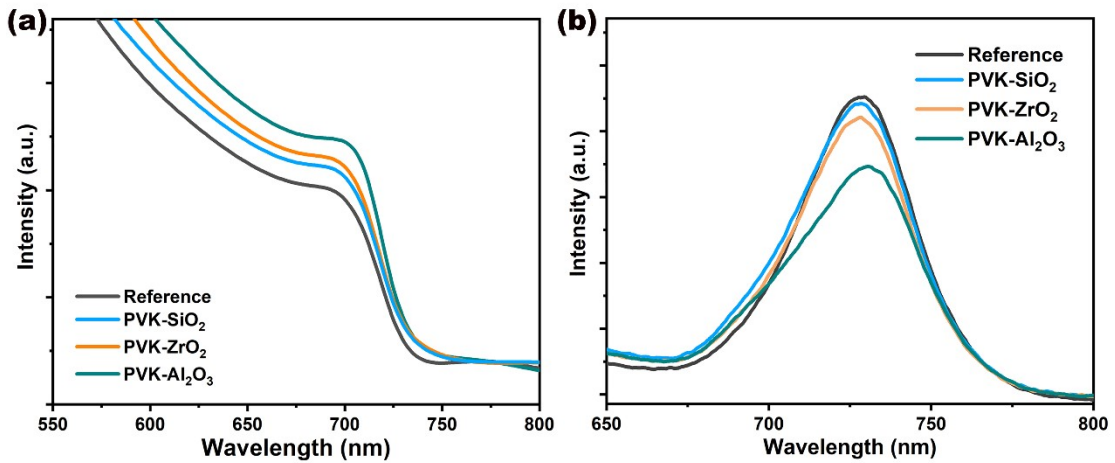

**Figure S4. Spectral characterization:** (a) Absorption spectra of reference and three SNOPs added into PVK layer of PSCs; (b) PL spectra of reference and three SNOPs added into PVK layer of PSCs.

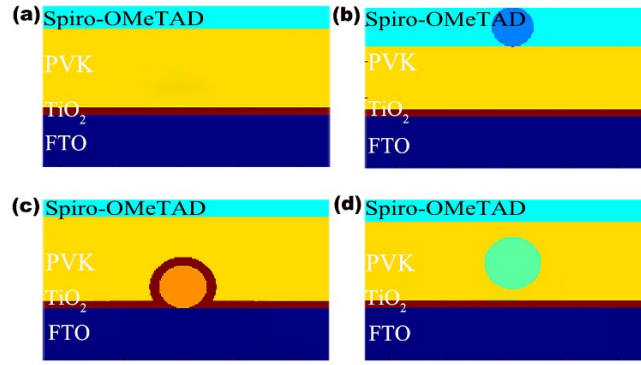

**Figure S5. Schematic diagram of simulation of the light intensity distribution of SNOPs added into different layers of PSCs: (a) Reference; (b) Spiro layer; (c) TiO<sub>2</sub> layer; and (d) PVK layer.**

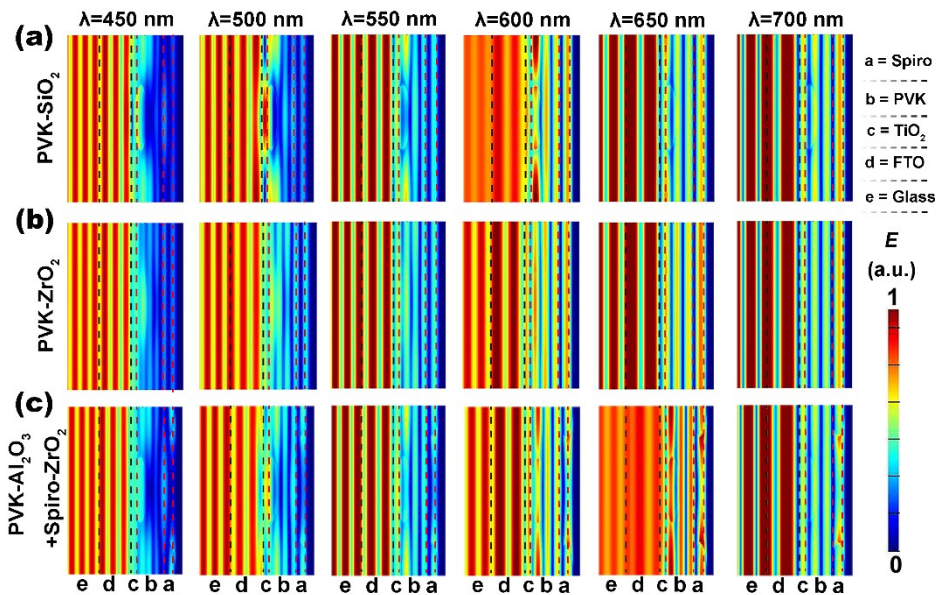

**Figure S6. Simulation of the light intensity distribution at six different incident wavelengths in three cases: (a) PVK-SiO<sub>2</sub>; (b) PVK-ZrO<sub>2</sub>; and (c) PVK-Al<sub>2</sub>O<sub>3</sub>+PVK-ZrO<sub>2</sub>.**

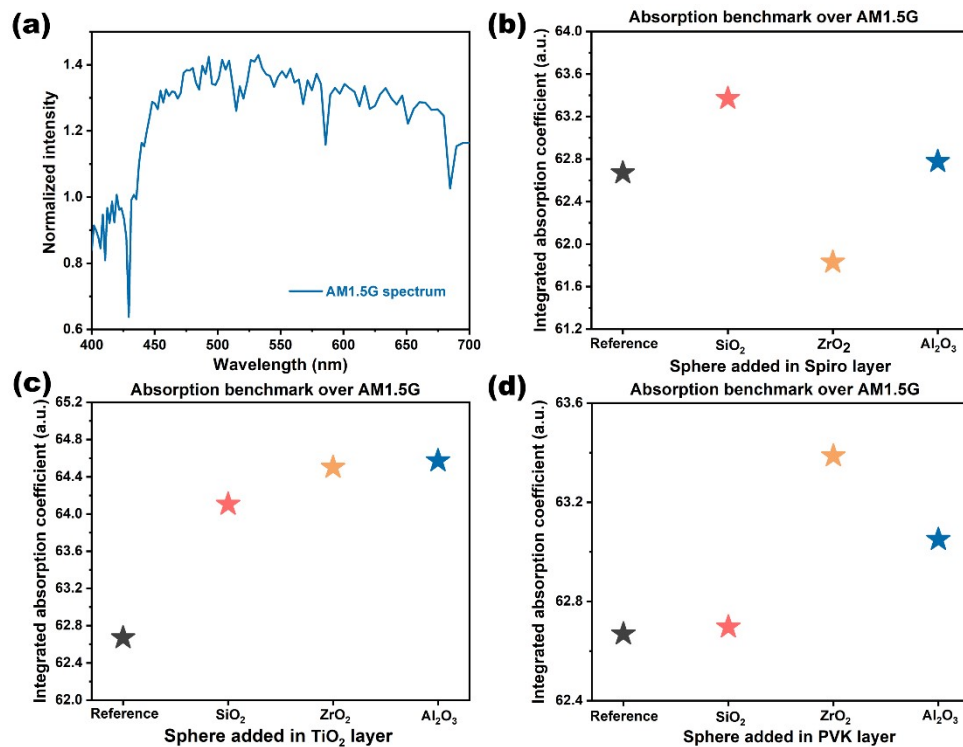

**Figure S7.** The integrated absorption coefficient of reference and three SNOPs added into different layers of PSCs under absorption benchmark over AM 1.5G (reference, SiO<sub>2</sub>, ZrO<sub>2</sub>, and Al<sub>2</sub>O<sub>3</sub>): (a) AM 1.5G spectrum; (b) Spiro layer; (c) TiO<sub>2</sub> layer; and (d) PVK layer.

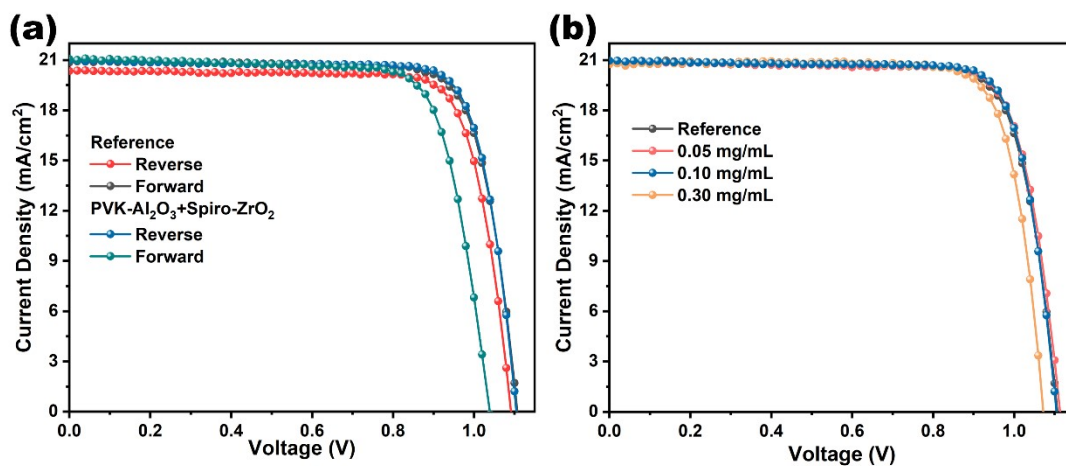

**Figure S8. Photovoltaic characterization:** (a) *J-V* characteristics of reference and optimized (PVK-Al<sub>2</sub>O<sub>3</sub>+Spiro-ZrO<sub>2</sub>) devices; (b) Based on different concentrations (PVK-Al<sub>2</sub>O<sub>3</sub>+Spiro-ZrO<sub>2</sub>).

**Table S1.** The photovoltaic parameters of PSCs are extracted from **Figure 2a**.

| Device                                           | $J_{SC}$ (mA/cm <sup>2</sup> ) | $V_{OC}$ (V) | FF (%) | PCE (%) |
|--------------------------------------------------|--------------------------------|--------------|--------|---------|
| Reference                                        | 20.34                          | 1.091        | 79.71  | 17.70   |
| Spiro-Al <sub>2</sub> O <sub>3</sub>             | 20.57                          | 1.103        | 79.56  | 18.05   |
| TiO <sub>2</sub> -Al <sub>2</sub> O <sub>3</sub> | 20.66                          | 1.101        | 79.85  | 18.16   |
| PVK-Al <sub>2</sub> O <sub>3</sub>               | 20.85                          | 1.106        | 79.29  | 18.30   |

**Table S2.** The photovoltaic parameters of PSCs are extracted from **Figure 2d**.

| Device                             | Scan mode | $J_{SC}$ (mA/cm <sup>2</sup> ) | $V_{OC}$ (V) | FF (%) | PCE (%) |
|------------------------------------|-----------|--------------------------------|--------------|--------|---------|
| Reference                          | reverse   | 20.34                          | 1.091        | 79.71  | 17.70   |
|                                    | forward   | 20.25                          | 1.017        | 76.75  | 15.81   |
| PVK-Al <sub>2</sub> O <sub>3</sub> | reverse   | 20.85                          | 1.106        | 79.29  | 18.30   |
|                                    | forward   | 20.83                          | 1.100        | 71.52  | 16.40   |

**Table S3.** The photovoltaic parameters of PSCs are extracted from **Figure 2f**.

| Device                             | $J_{SC}$ (mA/cm <sup>2</sup> ) | $V_{OC}$ (V) | FF (%) | PCE (%) |
|------------------------------------|--------------------------------|--------------|--------|---------|
| Reference                          | 20.34                          | 1.091        | 79.71  | 17.70   |
| PVK-SiO <sub>2</sub>               | 20.54                          | 1.105        | 79.71  | 18.10   |
| PVK-ZrO <sub>2</sub>               | 20.65                          | 1.103        | 79.57  | 18.14   |
| PVK-Al <sub>2</sub> O <sub>3</sub> | 20.85                          | 1.106        | 79.29  | 18.30   |

**Table S4.** The photovoltaic parameters of PSCs are extracted from **Figure S8a**.

| Device                                                         | Scan mode | $J_{SC}$ (mA/cm <sup>2</sup> ) | $V_{OC}$ (V) | FF (%) | PCE (%) |
|----------------------------------------------------------------|-----------|--------------------------------|--------------|--------|---------|
| Reference                                                      | reverse   | 20.85                          | 1.106        | 79.29  | 18.30   |
|                                                                | forward   | 20.83                          | 1.100        | 71.52  | 16.40   |
| PVK-Al <sub>2</sub> O <sub>3</sub> +<br>Spiro-ZrO <sub>2</sub> | reverse   | 20.96                          | 1.103        | 80.12  | 18.55   |
|                                                                | forward   | 21.05                          | 1.039        | 76.52  | 16.74   |



**Table S5.** The photovoltaic parameters of PSCs extracted from **Figure S8b**.

| <b>Device</b>                     | <b><math>J_{SC}</math> (mA/cm<sup>2</sup>)</b> | <b><math>V_{OC}</math> (V)</b> | <b>FF (%)</b> | <b>PCE (%)</b> |
|-----------------------------------|------------------------------------------------|--------------------------------|---------------|----------------|
| <b>Reference</b>                  | <b>20.85</b>                                   | <b>1.106</b>                   | <b>79.29</b>  | <b>18.30</b>   |
| <b>0.05 mg/mL ZrO<sub>2</sub></b> | <b>20.82</b>                                   | <b>1.113</b>                   | <b>79.58</b>  | <b>18.45</b>   |
| <b>0.10 mg/mL ZrO<sub>2</sub></b> | <b>20.96</b>                                   | <b>1.103</b>                   | <b>80.12</b>  | <b>18.55</b>   |
| <b>0.30 mg/mL ZrO<sub>2</sub></b> | <b>20.74</b>                                   | <b>1.072</b>                   | <b>80.47</b>  | <b>17.90</b>   |
